# Supplementary material for: Pb2Bi2GaB3O11, a new congruent-melting galloborate containing two types of asymmetric cations with a moderate birefringence
Source: Royal Society of Chemistry journal article supplement (doi:10.1039/c6dt03761e), 2016-01-01

## Supporting Information

### **Pb<sub>2</sub>Bi<sub>2</sub>GaB<sub>3</sub>O<sub>11</sub>, A New Congruent-Melting Galloborate Containing Two Types of Asymmetric Cations with a Moderate Birefringence**

Lili Liu,<sup>a,b</sup> Yun Yang,<sup>a\*</sup> Linping Li,<sup>a</sup> Zihua Yang<sup>a</sup> and Shilie Pan<sup>a\*</sup>

- a. Key Laboratory of Functional Materials and Devices for Special Environments of CAS; Xinjiang Key Laboratory of Electronic Information Materials and Devices, Xinjiang Technical Institute of Physics & Chemistry of CAS, 40-1 South Beijing Road, Urumqi 830011, China.
- b. University of Chinese Academy of Sciences, Beijing 100049, China.

Table S1 Atomic coordinates ( $\times 10^4$ ) and equivalent isotropic displacement parameters ( $\text{\AA}^2 \times 10^3$ ) for  $\text{Pb}_2\text{Bi}_2\text{GaB}_3\text{O}_{11}$ .  $U(\text{eq})$  is defined as one third of the trace of the orthogonalized  $U_{ij}$  tensor.

|       | X       | Y        | Z        | U(eq) |
|-------|---------|----------|----------|-------|
| Bi(1) | 4338(1) | 2993(1)  | -68(1)   | 13(1) |
| Pb(1) | 1576(1) | 5926(1)  | 599(1)   | 17(1) |
| Ga(1) | 2500    | 2500     | 0        | 9(1)  |
| B(1)  | 0       | 5170(20) | 2500     | 5(4)  |
| B(2)  | 3249(9) | 5078(19) | 2390(30) | 8(3)  |
| O(1)  | 644(7)  | 4390(13) | 1941(18) | 18(3) |
| O(2)  | 1798(7) | 1524(12) | 1876(17) | 13(2) |
| O(3)  | 2587(7) | 4369(13) | 1777(18) | 15(2) |
| O(4)  | 3966(7) | 4466(13) | 2323(19) | 21(3) |
| O(5)  | 5000    | 1710(20) | 2500     | 30(5) |
| O(6)  | 3419(6) | 1552(12) | 995(16)  | 9(2)  |

Table S2 Bond lengths [ $\text{\AA}$ ] and angles [deg] for  $\text{Pb}_2\text{Bi}_2\text{GaB}_3\text{O}_{11}$ .

|                   |           |                     |           |
|-------------------|-----------|---------------------|-----------|
| Bi(1)-O(6)        | 2.167(10) | O(2)#1-Bi(1)-O(1)#1 | 84.2(4)   |
| Bi(1)-O(4)        | 2.181(13) | O(5)-Bi(1)-O(1)#1   | 87.8(5)   |
| Bi(1)-O(2)#1      | 2.354(12) | O(1)-Pb(1)-O(3)     | 92.3(4)   |
| Bi(1)-O(5)        | 2.370(9)  | O(1)-Pb(1)-O(6)#2   | 75.8(4)   |
| Bi(1)-O(1)#1      | 2.466(12) | O(3)-Pb(1)-O(6)#2   | 79.0(4)   |
| Pb(1)-O(1)        | 2.302(12) | O(1)-Pb(1)-O(6)#1   | 69.3(4)   |
| Pb(1)-O(3)        | 2.367(12) | O(3)-Pb(1)-O(6)#1   | 67.7(4)   |
| Pb(1)-O(6)#2      | 2.375(11) | O(6)#2-Pb(1)-O(6)#1 | 129.7(3)  |
| Pb(1)-O(6)#1      | 2.449(10) | O(6)-Ga(1)-O(6)#1   | 180.0(3)  |
| Ga(1)-O(6)        | 1.920(11) | O(6)-Ga(1)-O(2)     | 95.4(5)   |
| Ga(1)-O(6)#1      | 1.920(11) | O(6)#1-Ga(1)-O(2)   | 84.6(5)   |
| Ga(1)-O(2)        | 1.964(11) | O(6)-Ga(1)-O(2)#1   | 84.6(5)   |
| Ga(1)-O(2)#1      | 1.964(11) | O(6)#1-Ga(1)-O(2)#1 | 95.4(5)   |
| Ga(1)-O(3)#1      | 2.054(12) | O(2)-Ga(1)-O(2)#1   | 180.0(8)  |
| Ga(1)-O(3)        | 2.054(12) | O(6)-Ga(1)-O(3)#1   | 84.9(5)   |
| B(1)-O(1)#3       | 1.368(16) | O(6)#1-Ga(1)-O(3)#1 | 95.1(5)   |
| B(1)-O(1)         | 1.368(16) | O(2)-Ga(1)-O(3)#1   | 88.9(5)   |
| B(1)-O(5)#4       | 1.37(3)   | O(2)#1-Ga(1)-O(3)#1 | 91.1(5)   |
| B(2)-O(4)         | 1.36(2)   | O(6)-Ga(1)-O(3)     | 95.1(5)   |
| B(2)-O(3)         | 1.370(19) | O(6)#1-Ga(1)-O(3)   | 84.9(5)   |
| B(2)-O(2)#2       | 1.379(19) | O(2)-Ga(1)-O(3)     | 91.1(5)   |
| O(6)-Bi(1)-O(4)   | 83.5(4)   | O(2)#1-Ga(1)-O(3)   | 88.9(5)   |
| O(6)-Bi(1)-O(2)#1 | 70.5(4)   | O(3)#1-Ga(1)-O(3)   | 180.0(7)  |
| O(4)-Bi(1)-O(2)#1 | 91.7(4)   | O(1)#3-B(1)-O(1)    | 119.2(19) |
| O(6)-Bi(1)-O(5)   | 80.0(4)   | O(1)#3-B(1)-O(5)#4  | 120.4(9)  |
| O(4)-Bi(1)-O(5)   | 83.4(4)   | O(1)-B(1)-O(5)#4    | 120.4(9)  |
| O(2)#1-Bi(1)-O(5) | 150.5(3)  | O(4)-B(2)-O(3)      | 124.9(14) |
| O(6)-Bi(1)-O(1)#1 | 71.1(4)   | O(4)-B(2)-O(2)#2    | 116.1(13) |
| O(4)-Bi(1)-O(1)#1 | 154.2(4)  | O(3)-B(2)-O(2)#2    | 119.0(13) |

Symmetry transformations used to generate equivalent atoms:

|    |                     |    |                    |
|----|---------------------|----|--------------------|
|    | $-x+1/2, -y+1/2, -$ |    | $-x+1/2, y+1/2, -$ |
| #1 | $z$                 | #2 | $z+1/2$            |
| #3 | $-x, y, -z+1/2$     | #4 | $x-1/2, y+1/2, z$  |
|    | $-x+1/2, y-1/2, -$  |    |                    |
| #5 | $z+1/2$             | #6 | $x+1/2, y-1/2, z$  |
| #7 | $-x+1, y, -z+1/2$   |    |                    |

Table S3 The calculated anisotropic polarizability of  $\text{BO}_3$ ,  $\text{PbO}_5$ ,  $\text{BiO}_6$ .

| Groups                | $\text{BO}_3$ | $\text{PbO}_5$ | $\text{BiO}_6$ |
|-----------------------|---------------|----------------|----------------|
| $\Delta\alpha$ (a.u.) | 8.6           | 48.3           | 44.7           |

Figure S1 The unit cell and asymmetric unit of  $\text{Pb}_2\text{Bi}_2\text{GaB}_3\text{O}_{11}$ .

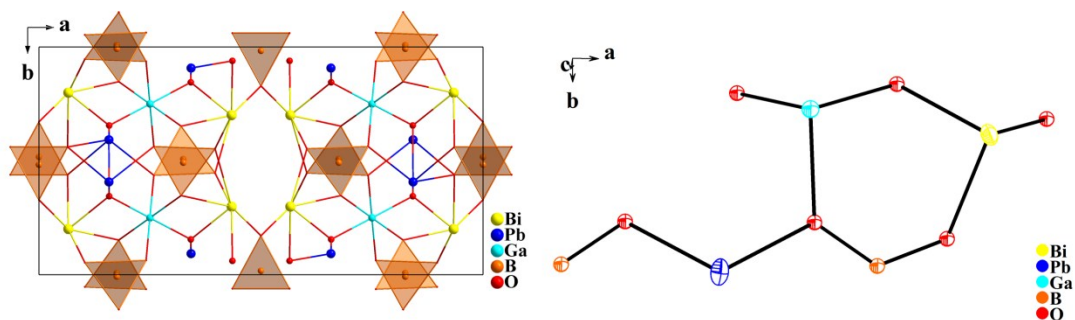

Figure S2 The coordination environments of cations in  $\text{Pb}_2\text{Bi}_2\text{GaB}_3\text{O}_{11}$ .

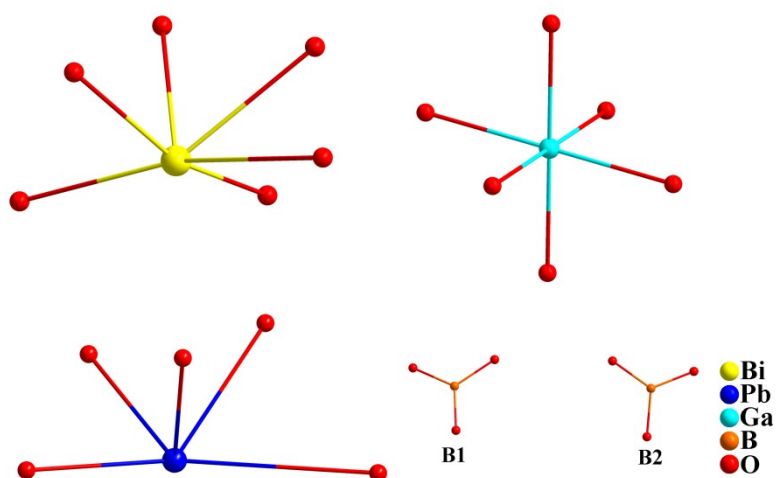

Figure S3 The  $\text{BO}_3$  groups in  $\text{Pb}_2\text{Bi}_2\text{GaB}_3\text{O}_{11}$ .

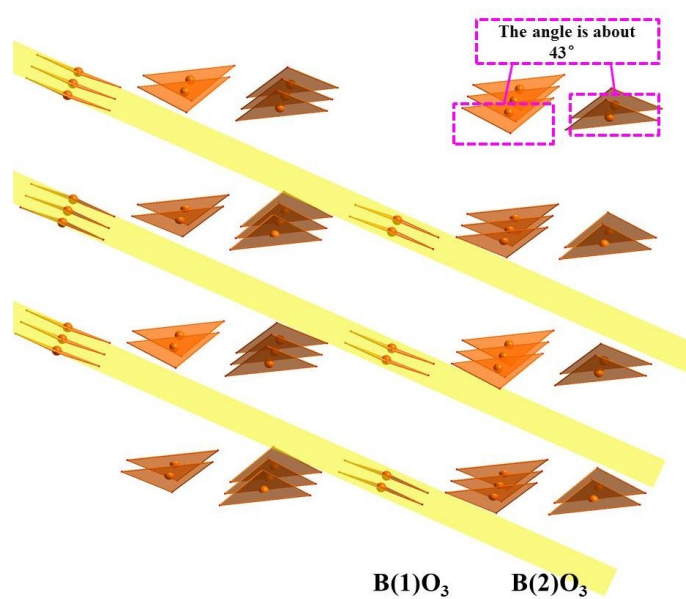

Figure S4 The UV-Vis-NIR diffuse reflectance spectrum (a) and IR spectrum (b).

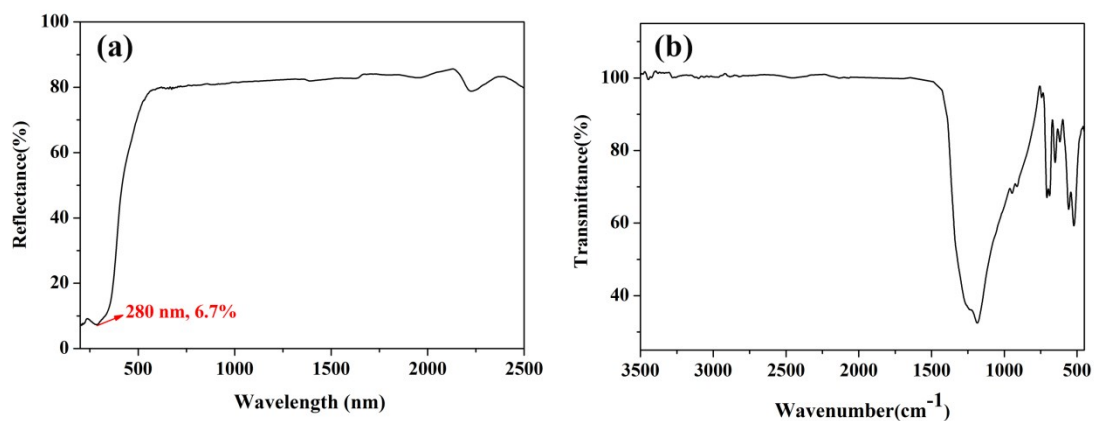

Figure S5 TG-DSC curves of Pb<sub>2</sub>Bi<sub>2</sub>GaB<sub>3</sub>O<sub>11</sub>.

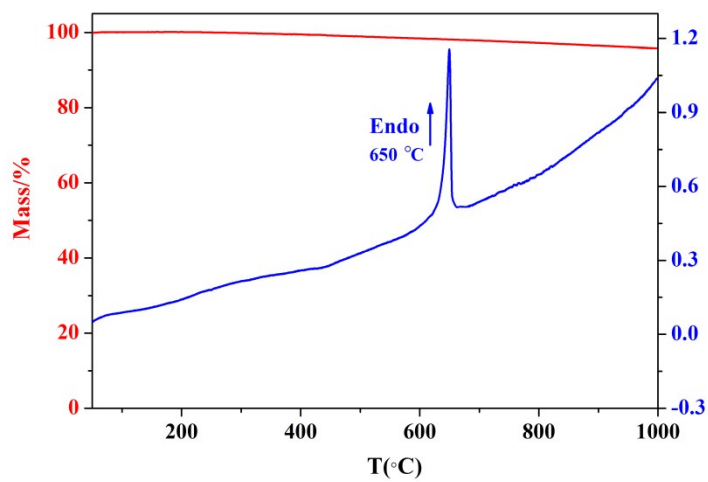

Supplement: c6dt03761e1.pdf [file c6dt03761e1.pdf]
